# Supplementary material for: Nanostructured RuO2–Co3O4@RuCo-EO with low Ru loading as a high-efficiency electrochemical oxygen evolution catalyst
Source: Royal Society of Chemistry journal article supplement (doi:10.1039/d1ra00271f), 2021-01-01
Supplement: d1ra00271f1.pdf [file d1ra00271f1.pdf]

## Supporting information

### **Nanostructured RuO<sub>2</sub>-Co<sub>3</sub>O<sub>4</sub>@RuCo-EO with low Ru loading as a high-efficiency electrochemical oxygen evolution catalyst**

Lingjun Tan, Ailian Zhang, Ziyi Liu, Ping'an Wei, Panpan Yang, Huan Guo, Hua Fang, Juanjuan

Han, Yuchan Zhu\* and Zhandong Ren

School of Chemical and Environmental Engineering, Wuhan Polytechnic University, Wuhan,  
430023, P. R. China.

E-mail: zhuyuchan@163.com

## **Experimental section**

### **Treatment of Ti substrate**

The titanium plate was first sandblasted and then ultrasonically clean in acetone, ethanol and ultrapure water for 10 minutes. This process is repeated several times to remove all surface impurities. The Ti plate processed above was placed on the sample stage of the vacuum chamber.

### **Preparation of RuO<sub>2</sub>/Ru electrode**

During the experiment, a Ru target with a purity of 99.99% was used as sputtering targets. Evacuate the vacuum chamber to  $4 \times 10^{-4}$  Pa before sputtering. Then high-purity Ar gas was introduced, and the flow rate of argon gas was  $30 \text{ mL min}^{-1}$ . Adjust the pressure of the vacuum chamber to  $1.0 \sim 1.2$  Pa, and then the Ru target was connected to the DC power supply. The sputtering power of the Ru target was 60 W and the sputtering time is 10 min. After the sputtering was completed, the resulting sample was recorded as the Ru catalyst. Next, it was calcined in a muffle furnace at  $400^\circ\text{C}$  for 2 h, and the resulting sample was recorded as the RuO<sub>2</sub>/Ru catalyst.

### **Preparation of RuO<sub>2</sub> electrode**

During the experiment, a Ru target with a purity of 99.99% was used as sputtering targets. Evacuate the vacuum chamber to  $4 \times 10^{-4}$  Pa before sputtering. Then high-purity Ar and O<sub>2</sub> gas was introduced. The flow rate of argon and O<sub>2</sub> gas was 24 and  $6 \text{ mL min}^{-1}$ , respectively. Adjust the pressure of the vacuum chamber to  $1.0 \sim 1.2$  Pa, and then the Ru target was connected to the DC power supply. The sputtering power of the Ru target was 60 W and the sputtering time is 10 min. Next, it was calcined in a muffle furnace at  $400^\circ\text{C}$  for 2 h, and the resulting sample was recorded as the RuO<sub>2</sub> catalyst.

### **Preparation of RuO<sub>2</sub>-T electrode**

RuCl<sub>3</sub>·xH<sub>2</sub>O solid was dissolved in the mixed solution of isopropanol and ethanol (the volume ratio of isopropanol to ethanol was 1:1), and its ion concentration was  $0.02 \text{ mol L}^{-1}$ .  $5 \mu\text{L}$  of the solution was dripped on a  $1 \text{ cm}^2$  Ti plate, then dried in an oven at  $120^\circ\text{C}$  for 10 min, and then oxidized at  $450^\circ\text{C}$  for 10 min in a muffle furnace. This process is repeated 6 times, and the last roasting time in muffle furnace is 1 h. Thereby obtaining the RuO<sub>2</sub> catalyst prepared by the thermal decomposition method and marked as RuO<sub>2</sub>-T catalyst.

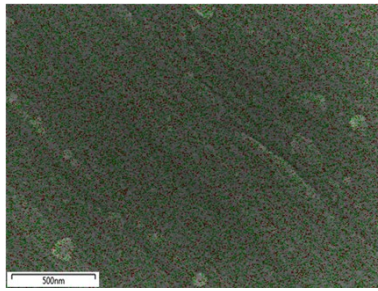

Ru L $\alpha$ 1

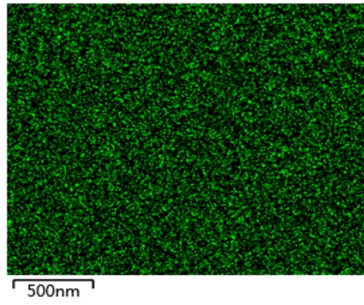

Co K $\alpha$ 1

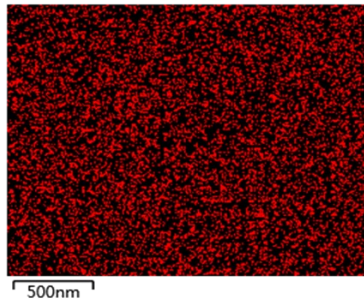

Figure S1 SEM mapping of RuO<sub>2</sub>/Co<sub>3</sub>O<sub>4</sub>-RuCo electrode.

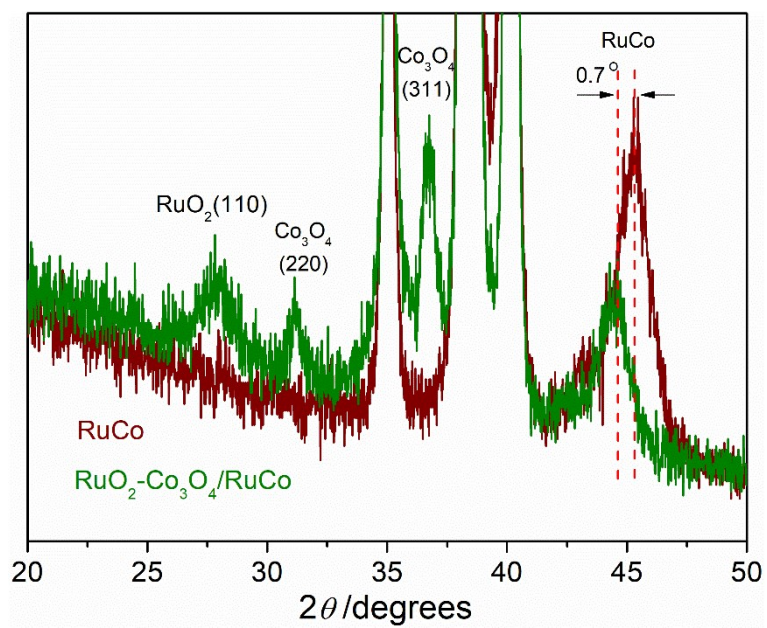

Figure S2 X-ray diffraction patterns of RuO<sub>2</sub>/Co<sub>3</sub>O<sub>4</sub>-RuCo and RuCo electrodes.

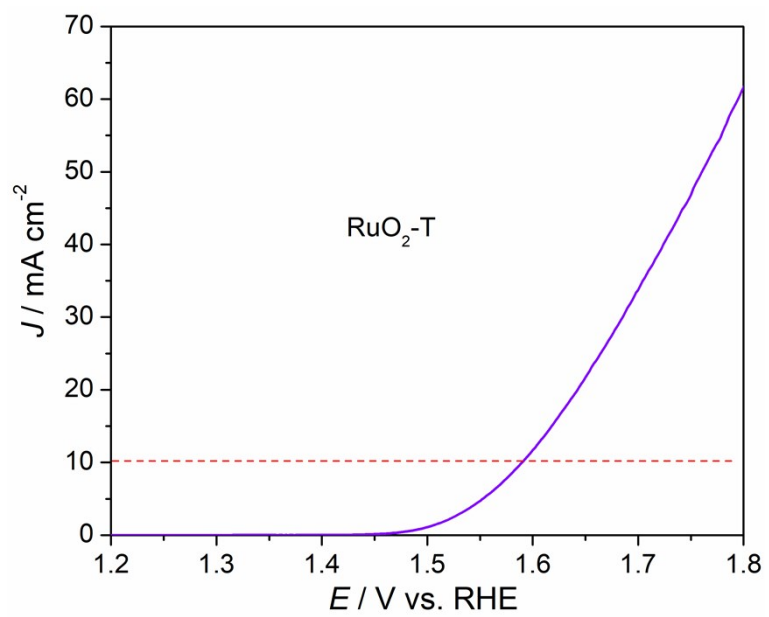

Figure S3 The OER activity of RuO<sub>2</sub>-T electrode prepared by thermal decomposition.

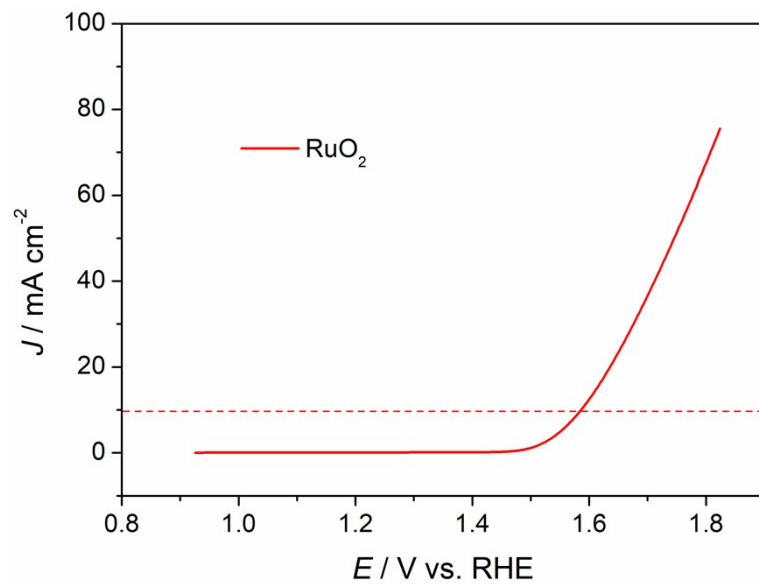

Figure S4 The OER activity of  $\text{RuO}_2$  electrode prepared by magnetron sputtering.

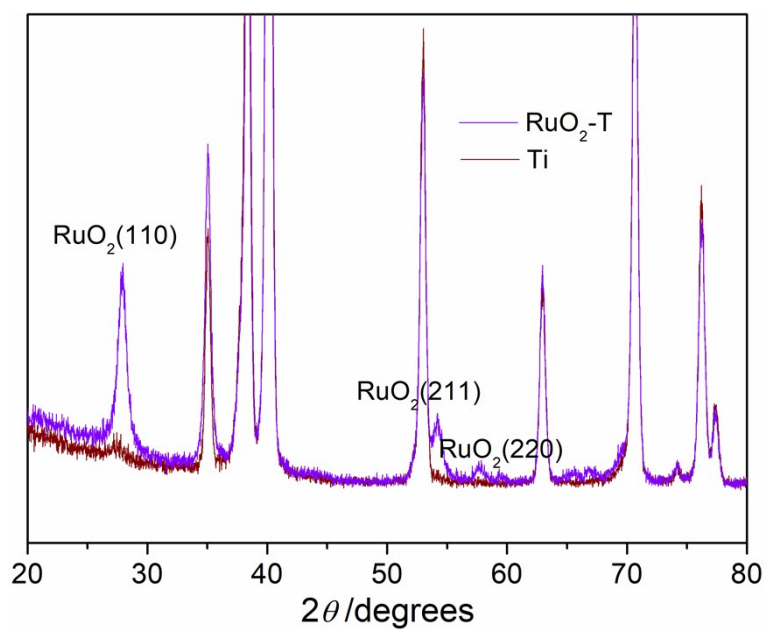

Figure S5 X-ray diffraction pattern of RuO<sub>2</sub>-T electrode prepared by thermal decomposition.

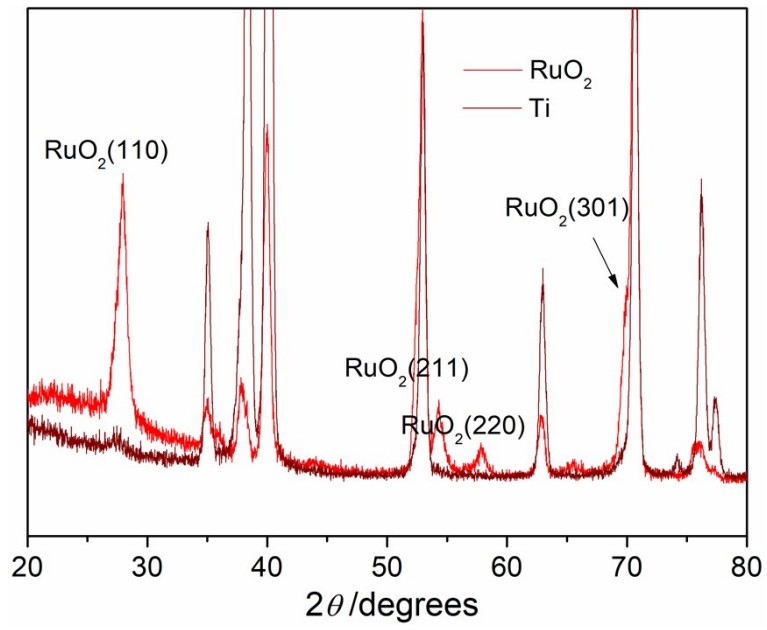

Figure S6 X-ray diffraction pattern of RuO<sub>2</sub> electrode prepared by magnetron sputtering.



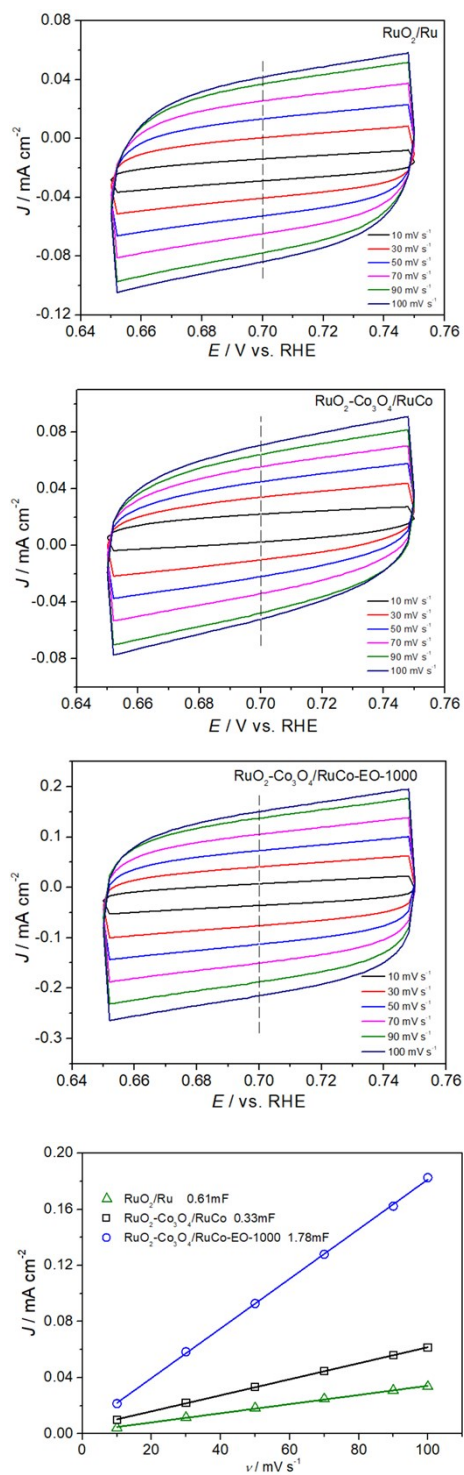

Figure S7 The double-layer capacitances of RuO<sub>2</sub>/Ru, RuO<sub>2</sub>/Co<sub>3</sub>O<sub>4</sub>-RuCo and RuO<sub>2</sub>/Co<sub>3</sub>O<sub>4</sub>-RuCo-EO electrodes.

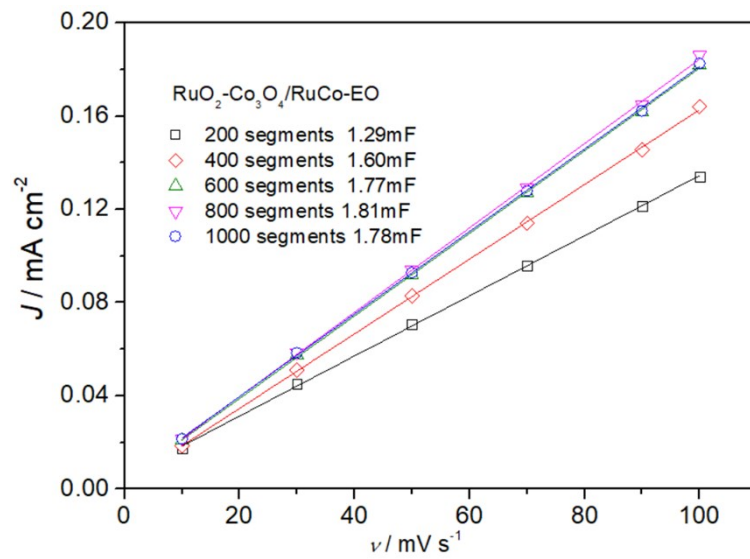

Figure S8 The double-layer capacitances of RuO<sub>2</sub>/Co<sub>3</sub>O<sub>4</sub>-RuCo-EO electrodes with different number of CV scan.

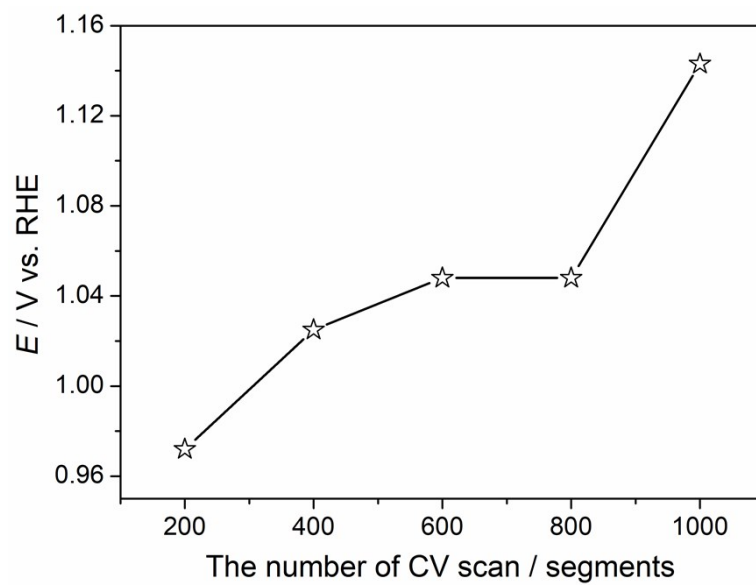

Figure S10 The relationship between the oxidation potential of Co and the number of CV scan

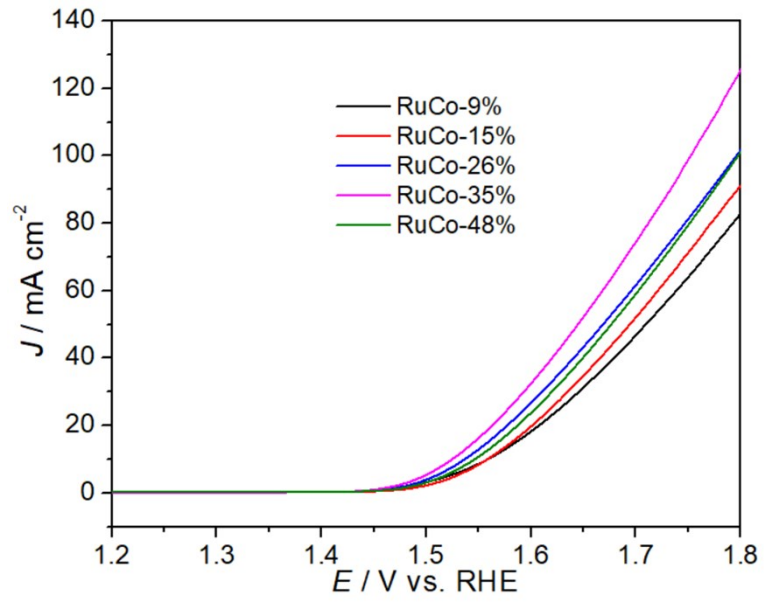

Figure S10 The OER activities of  $\text{RuO}_2/\text{Co}_3\text{O}_4$ -RuCo-EO with different Co content.

When the sputtering power of Ru is fixed at 60 W and the sputtering power of Co is 20, 40, 60, 80, and 100 W, the corresponding Co molar ratios is 9, 15, 26, 35, and 48 % after EO treatment of 1000 segments, respectively.

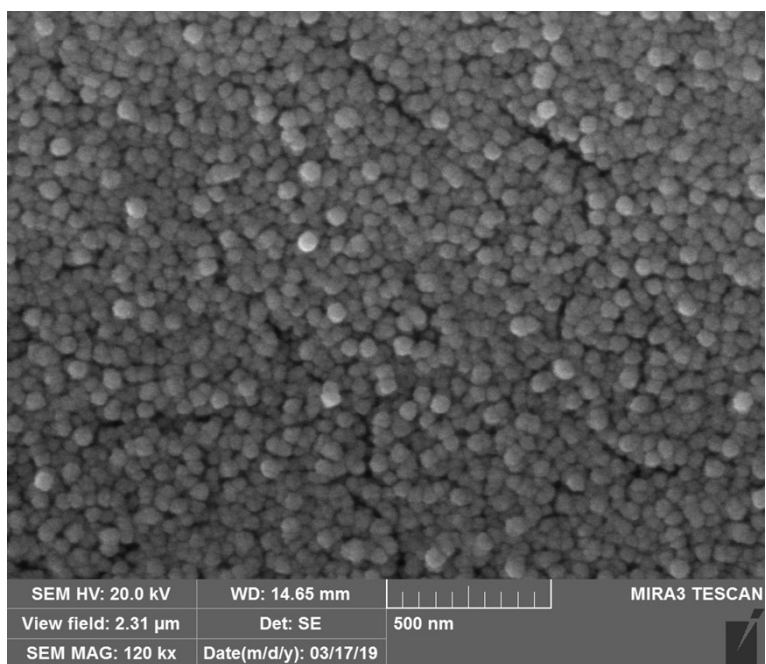

Figure S11 SEM image of RuO<sub>2</sub> electrode prepared by magnetron sputtering.

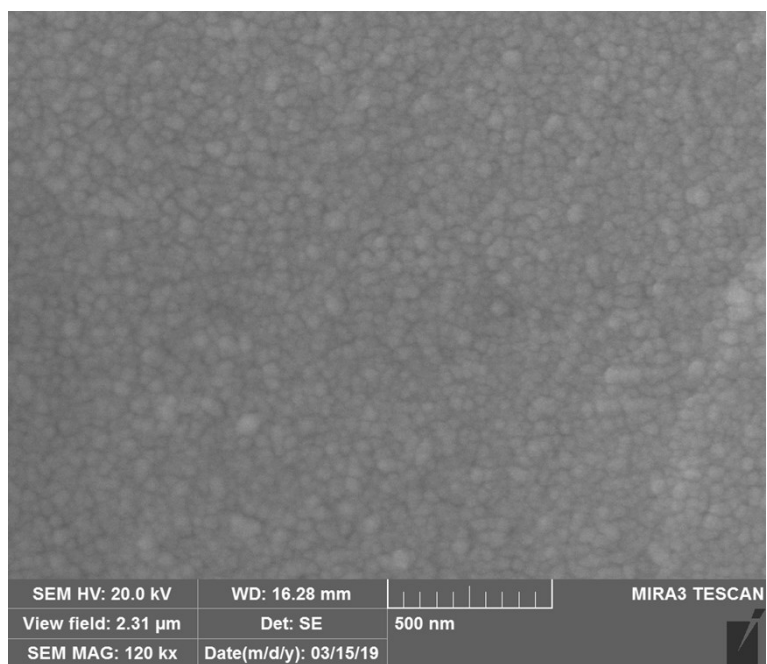

Figure S12 SEM image of RuO<sub>2</sub>-T electrode prepared by thermal decomposition.

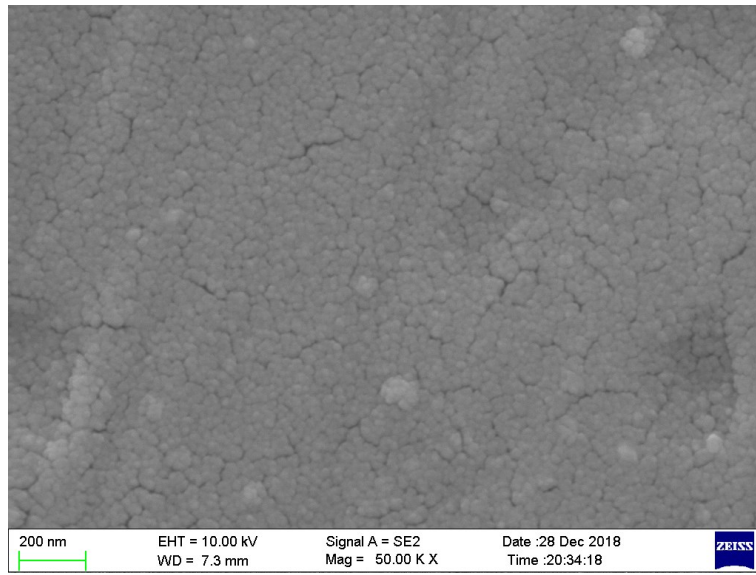

Figure S13 SEM image of RuO<sub>2</sub>/Ru electrode prepared by magnetron sputtering.

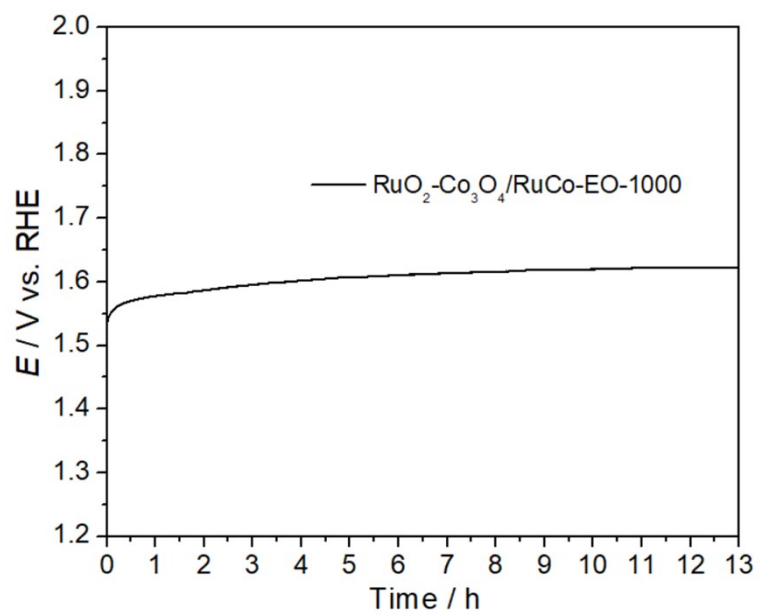

Figure S14 The OER stability of the RuO<sub>2</sub>/Co<sub>3</sub>O<sub>4</sub>-RuCo-EO-1000 electrode.



Table S1 The molar ratio of Ru to Co of RuO<sub>2</sub>-Co<sub>3</sub>O<sub>4</sub>/RuCo-EO electrode

| CV scan (segments) | Ru:Co (mol:mol) |
|--------------------|-----------------|
| 0                  | 56:44           |
| 200                | 61:39           |
| 400                | 66:34           |
| 600                | 67:33           |
| 800                | 67:33           |
| 1000               | 65:35           |
